# Supplementary material for: Comparative transcriptomics and proteomics of three different aphid species identifies core and diverse effector sets
Source: PubMed Central journal article supplement (PMC4776380; doi:10.1186/s12864-016-2496-6), 2016-03-02

# Proteomic Identified proteins

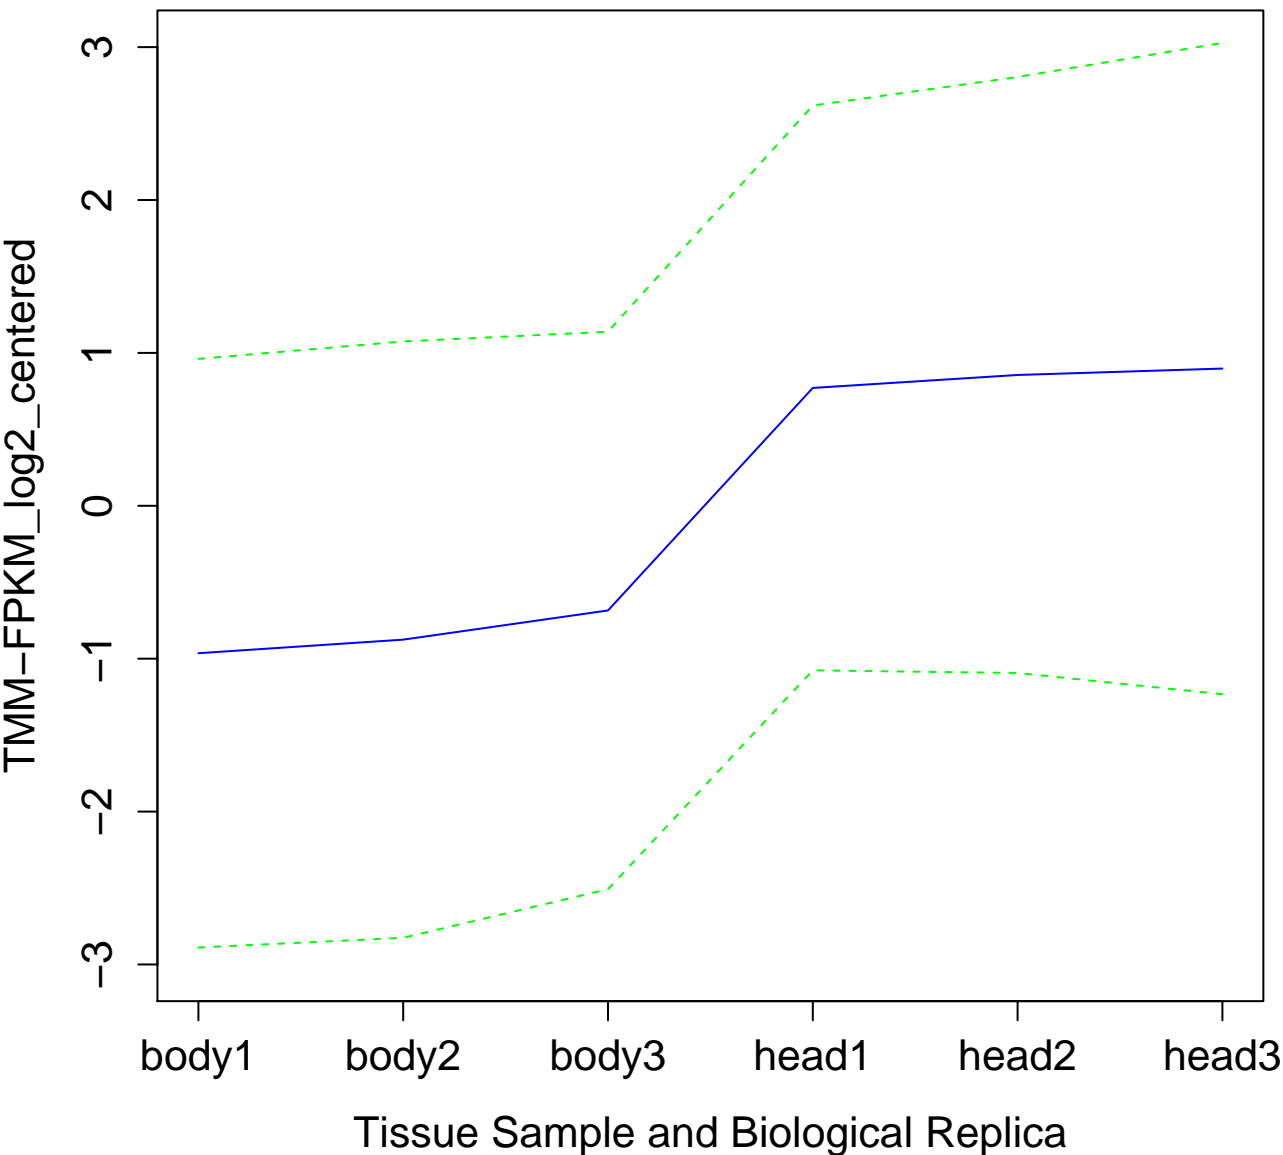

Supplement: 12864_2016_2496_MOESM8_ESM.pdf [file 12864_2016_2496_MOESM8_ESM.pdf]
